# Supplementary material for: Unveiling the Immunomodulatory Characteristics of Haemonchus contortus Ephrin Domain Containing Protein in the Parasite–Host Interactions
Source: MDPI journal article supplement (doi:10.3390/ani10112137), 2020-11-17
Supplement: s1 [file s1]

**Table 1.** Primer sequences for FQ-PCR.

| Gene name | 5'–3'              |                     |
|-----------|--------------------|---------------------|
|           | Forward            | Reverse             |
| β-actin   | CACCACACCTTCTACAAC | TCTGGGTCATCTTCTCAC  |
| IL-9      | GATGCGGCTGATTGTTT  | CTCGTGCTCACTGTGGAGT |
